# Supplementary material for: Petroleum Jelly vs. Saline in Tracheostomy Wound Care and Ulcer Prevention: A Randomized Controlled Trial
Source: Research Square preprint supplement (doi:10.21203/rs.3.rs-6396685/v1), 2025-05-07
Supplement: Supplementary file 1 [file e1d9a26732aafee44182197f.pdf]

## CONSORT 2010 Checklist – Completed for Manuscript Submission

Title: Petroleum Jelly vs. Saline in Tracheostomy Wound Care and Ulcer Prevention: A Randomized Controlled Trial

Corresponding Author: Dr. Kanokrat Bunnag

Journal: BMC Surgery

Checklist completed based on the final submitted manuscript.

| Item No | Checklist Item                                                                       | Reported on Page No / Comments  |
|---------|--------------------------------------------------------------------------------------|---------------------------------|
| 1a      | Identification as a randomized trial in the title                                    | Title page                      |
| 1b      | Structured summary of trial design, methods, results, and conclusions                | Page 1 (Abstract)               |
| 2a      | Scientific background and explanation of rationale                                   | Pages 2–3                       |
| 2b      | Specific objectives or hypotheses                                                    | Page 3 (End of Introduction)    |
| 3a      | Description of trial design (such as parallel, factorial) including allocation ratio | Pages 3–4                       |
| 3b      | Important changes to methods after trial commencement, with reasons                  | Not applicable                  |
| 4a      | Eligibility criteria for participants                                                | Page 3                          |
| 4b      | Settings and locations where the data were collected                                 | Page 3                          |
| 5       | Interventions for each group with sufficient detail                                  | Pages 4–5                       |
| 6a      | Pre-specified primary and secondary outcome measures                                 | Page 5                          |
| 6b      | Changes to trial outcomes after commencement                                         | Not applicable                  |
| 7a      | How sample size was determined                                                       | Page 4                          |
| 7b      | Interim analyses and stopping guidelines                                             | Page 4 – explicitly stated none |
| 8a      | Method used to generate the random allocation                                        | Page 4                          |

|     |                                                             |                                          |
|-----|-------------------------------------------------------------|------------------------------------------|
|     | sequence                                                    |                                          |
| 8b  | Type of randomization; details of any restriction           | Page 4 (block of 4)                      |
| 9   | Allocation concealment mechanism                            | Page 4 (sealed, opaque envelopes)        |
| 10  | Who generated, enrolled, and assigned participants          | Page 4                                   |
| 11a | Blinding after assignment to interventions                  | Page 5 (outcome assessors blinded)       |
| 11b | Similarity of interventions                                 | Not applicable (topical wound care)      |
| 12a | Statistical methods used for primary and secondary outcomes | Page 6                                   |
| 12b | Methods for additional analyses                             | Page 6 – no ancillary analysis performed |
| 13a | Participant flow: assigned, treated, analyzed               | Page 7 (all 28 completed)                |
| 13b | Losses and exclusions after randomisation                   | Page 7 (none reported)                   |
| 14a | Recruitment and follow-up dates                             | Page 3 (Nov 2021 – Dec 2022)             |
| 14b | Why the trial ended or was stopped                          | Not applicable (completed as planned)    |
| 15  | Baseline demographic and clinical characteristics           | Pages 7–8, Table 1                       |
| 16  | Number analyzed in each group                               | Pages 7–9                                |
| 17a | Outcomes for each group, effect size and precision          | Pages 9–12, Tables 2–3                   |
| 17b | Absolute and relative effect sizes for binary outcomes      | Not applicable (continuous data)         |
| 18  | Results of other analyses including subgroup and adjusted   | Page 6 – not performed                   |
| 19  | All important harms or unintended effects                   | Page 12 – no adverse events reported     |
| 20  | Trial limitations                                           | Pages 14–15                              |
| 21  | Generalisability of findings                                | Page 15                                  |
| 22  | Interpretation consistent with results and evidence         | Page 14–15                               |
| 23  | Registration number and name of trial registry              | Abstract + Page 3 (TCTR20240806002)      |
| 24  | Where full trial protocol can be accessed                   | Page 16, Declarations                    |
| 25  | Sources of funding and role of funders                      | Page 16, Declarations – no funding       |
